# Supplementary material
Source: PubMed Central journal article supplement (PMC1762055)
Supplement: pmed.0030487.sd001.pdf [file pmed.0030487.sd001.pdf]

## **A hosszú műszakok hatása az orvosi műhibákra, szövődményekre és figyelemhiányra**

*Előzmények:* Egy, a közelmúltban végzett, kontrollált vizsgálatban kimutatták, hogy súlyos betegeket ellátó intézményekben a hosszú (24 órás vagy annál is hosszabb) műszakok megszüntetése csökkenti a jelentős orvosi műhibák, és a poliszomnográfiaival vizsgált figyelemhiány arányát. Az eredmények felvetették annak lehetőségét, hogy a rezidens orvosoknál rendszeresen előforduló hosszú műszakok általánosabban fokozzák az orvosi műhibák és talán a szövődmények veszélyét. A jelenlegi vizsgálatot Amerikaszerzete, rezidens orvosok változatos populációján végeztük el arra keresve a választ, hogy vajon a hosszú műszakok rezidenseknél összefüggnek-e a súlyosabb orvosi műhibákkal, szövődményekkel és figyelemhiánnyal.

*Módszerek:* Az általunk végzett prospektív, országos, internetes felmérés során 2737 elsőéves rezidens 17003 havi jelentést töltött ki. Minden hónapban, a hosszú műszakok száma és a jelentős orvosi hibákat, elkerülhető szövődményeket és figyelemzavart tartalmazó beszámolók közötti kapcsolatot ún. „case-crossover” módszerrel vizsgáltuk, amely során minden kísérleti alany egyben önmaga kontrollja is volt.

*Eredmények:* A hosszú műszak-mentes hónapokhoz viszonyítva, azokban a hónapokban, amelyekben 1-4 illetve 5 vagy annál is több hosszú műszak volt, a valószínűségi rátája annak, hogy legalább egy, fáradtság okozta, jelentős orvosi műhiba bekövetkezik 3,5 (95% konfidencia intervallum: 3,3-3,7) illetve 7,5 (7,2-7,8). A kimerültség okozta szövődmények valószínűségi rátája, amely egyébként 8,7 (3,4-22) és 7,0 (4,3-11) volt, szinten növekedett. Azok a rezidensek, akik ötnél több hosszú műszakot vállaltak havonta, gyakrabban számoltak be figyelemzavarról, amely az előadások, megbeszélések, és klinikai tevékenységük során jelentkezett beleértve a műtéteket is.

*Az eredmények értelmezése:* A vizsgált rezidenseknél országsszerzete a hosszú műszakok kapcsolatban álltak a súlyos orvosi műhibák, a szövődmények és a figyelemzavar fokozott veszélyével. Az eredményeknek jelentős, közérdeket is érintő hatása van a posztgraduális orvos képzésre.
